# Supplementary material for: Sulfur transfer and activation by ubiquitin-like modifier system Uba4•Urm1 link protein urmylation and tRNA thiolation in yeast
Source: PubMed Central journal article supplement (PMC5349211; doi:10.15698/mic2016.11.539), 2016-10-24
Supplement: mic-03-554-s01.pdf [file mic-03-554-s01.pdf]

## Supplemental Data

## Sulfur transfer and activation by ubiquitin-like modifier system Uba4•Urm1 link protein urmylation and tRNA thiolation in yeast

André Jüdes<sup>1</sup>, Alexander Bruch<sup>1</sup>, Roland Klassen<sup>1</sup>, Mark Helm<sup>2</sup>  
and Raffael Schaffrath<sup>1\*</sup>

<sup>1</sup> Universität Kassel, Institut für Biologie, FG Mikrobiologie  
Heinrich-Plett-Str. 40, 34132 Kassel, Germany

<sup>2</sup> Johannes Gutenberg Universität Mainz, Institut für Pharmazie und Biochemie  
Staudinger Weg 5, 55128 Mainz, Germany

\* Corresponding author: eMail: [schaffrath@uni-kassel.de](mailto:schaffrath@uni-kassel.de)  
Phone: +49-561-804-4175  
FAX: +49-561-804-4337

## 1. Supplementary Tables

Table S1. Yeast strains used in this study.

| Strain | Genotype                                                      | Source     |
|--------|---------------------------------------------------------------|------------|
| BY4741 | <i>MA Ta his3Δ1 leu2Δ0 met15Δ0 ura3Δ0</i>                     | Euroscarf  |
| Y01400 | BY4741, <i>urm1Δ::kanMX4</i>                                  | Euroscarf  |
| Y01939 | BY4741, <i>uba4Δ::kanMX4</i>                                  | Euroscarf  |
| Y02507 | BY4741, <i>tum1Δ::kanMX4</i>                                  | Euroscarf  |
| Y07242 | BY4741, <i>ncs2Δ::kanMX4</i>                                  | Euroscarf  |
| Y04577 | BY4741, <i>ncs6Δ::kanMX4</i>                                  | Euroscarf  |
| Y02720 | BY4741, <i>ahp1Δ::kanMX4</i>                                  | Euroscarf  |
| Y02742 | BY4741, <i>elp3Δ::kanMX4</i>                                  | Euroscarf  |
| Y07270 | BY4741, <i>deg1Δ::kanMX4</i>                                  | Euroscarf  |
| RK28   | BY4741, <i>elp3Δ::kanMX4 uba4Δ::ScHIS3</i>                    | [1]        |
| FEY14  | BY4741, <i>urm1Δ::kanMX4 AHP1-c-myc::ScHIS3</i>               | [2]        |
| FEY15  | BY4741, <i>urm1Δ::kanMX4 uba4Δ::natNT2</i>                    | [2]        |
| FEY16  | BY4741, <i>ahp1Δ::kanMX4 urm1Δ::ScHIS3</i>                    | [2]        |
| FEY19  | BY4741, <i>ncs2Δ::kanMX4 urm1Δ::SpHIS5</i>                    | this study |
| FEY20  | BY4741, <i>ncs6Δ::kanMX4 urm1Δ::SpHIS5</i>                    | this study |
| FEY21  | BY4741, <i>tum1Δ::kanMX4 urm1Δ::SpHIS5</i>                    | this study |
| FEY25  | BY4741, <i>urm1Δ::kanMX4 uba4Δ::natNT2 ahp1Δ::SpHIS5</i>      | [2]        |
| FEY26  | BY4741, <i>urm1Δ::kanMX4 uba4Δ::natNT2 AHP1-c-myc::ScHIS3</i> | [2]        |
| FEY31  | BY4741, <i>uba4Δ::kanMX4 deg1Δ::SpHIS5</i>                    | this study |
| FEY32  | BY4741, <i>urm1Δ::kanMX4 uba4Δ::natNT2 tum1Δ::SpHIS5</i>      | this study |
| FEY34  | BY4741, <i>urm1Δ::kanMX4 uba4Δ::natNT2 ncs2Δ::SpHIS5</i>      | this study |
| FEY35  | BY4741, <i>urm1Δ::kanMX4 uba4Δ::natNT2 ncs6Δ::SpHIS5</i>      | this study |
| FEY41  | BY4741, <i>elp3Δ::kanMX4 uba4Δ::ScHIS3 tum1Δ::KIURA3</i>      | this study |
| FEY49  | BY4741, <i>uba4Δ::kanMX4 deg1Δ::SpHIS5 tum1Δ::KIURA3</i>      | this study |
| FEY50  | BY4741, <i>uba4Δ::kanMX4 deg1Δ::loxP</i>                      | this study |
| AWJ137 | <i>Kluyveromyces lactis</i> zymocin producing killer strain   | Lab stock  |

Table S2. Primers used in this study.

| Primer                | Sequence (5'-3')                                                        | Application     |
|-----------------------|-------------------------------------------------------------------------|-----------------|
| DEG1koF               | gggtgccacatgcaatcttactgccctactataacctcccttgacagctgaagcttcgtacgc         | DEG1 ko         |
| DEG1koR               | gaaatagtagtctcaagggtatattatacagggttataattattgcataggccactagtgatctg       | DEG1 ko         |
| KO_NCS2_FW            | tgctattgtccatccctactctagtttataaaataatctatcaagttcagctgaagcttcgtacgc      | NCS2 ko         |
| KO_NCS2_RV            | taaataaataaatacataaccattggaatagcgaagcctttgacatttcagcataggccactagtgatctg | NCS2 ko         |
| KO_NCS6_FW            | aaaattttggcgatgagacgatatggaagagtaaagcaaaggaaccgtccagctgaagcttcgtacgc    | NCS6 ko         |
| KO_NCS6_RV            | tatattatattatgttacgctgacttctctactgagctatataatggcataggccactagtgatctg     | NCS6 ko         |
| KO_TUM1_FW            | acaatgaggacaaaagcataaagttgtgaagaaaattgccatacattcacagctgaagcttcgtacgc    | TUM1 ko         |
| KO_TUM1_RV            | ttaatatgtagctaaataaatcgactgtcaagaatatttctcttagcataggccactagtgatctg      | TUM1 ko         |
| KO_URM1_FW            | caactgattctgatactaaaacgagataggttaatagcaaaatcgggagctgaagcttcgtacgc       | URM1 ko         |
| KO_URM1_RV            | ctttatataatataatgtagctgcttcttaaaaattatttctgctattgcataggccactagtgatctg   | URM1 ko         |
| UBA4_C225S_FW         | ccaaatgccgtgacctcttccaagaaggcggtgtgatag                                 | UBA4 SM         |
| UBA4_C225S_RV         | ctatcacaccgcttcttgggaagaggtcagcgcatctgg                                 | UBA4 SM         |
| UBA4_C397S_FW         | cagtaataatagtgattcttcccgcctacggtaacgactctc                              | UBA4 SM         |
| UBA4_C397S_RV         | gagagtcgttacccgtagcgggaaagaatcactatattactg                              | UBA4 SM         |
| UBA4_K122R_FW         | gagtcggaatggtgagatgtgagtcggccag                                         | UBA4 SM         |
| UBA4_K122R_RV         | ctggcggactcacatctcaacattccgactc                                         | UBA4 SM         |
| UBA4_K132R_FW         | gccaggcaatataatcacacgagactgaaccacacattaac                               | UBA4 SM         |
| UBA4_K132R_RV         | gtaaatgtgtgggttcagctcgtgatattgctctggc                                   | UBA4 SM         |
| UBA4_K156R_FW         | ccagtaatgctttgacatttccagaggttacaattatattagactg                          | UBA4 SM         |
| UBA4_K156R_RV         | cagtctaataatataatgtaacctctgaaaatgcaaaagcattactgg                        | UBA4 SM         |
| UBA4_K248R_FW         | gatggctgtgaaacttgagacttctcctggaatctaca                                  | UBA4 SM         |
| UBA4_K248R_RV         | gtgtagattcctaggataagctcaagttctacagccatc                                 | UBA4 SM         |
| UBA4_FW_Ndel          | gggcatatgaatgactaccatctcgaggataaccacgtctg                               | PC <sup>1</sup> |
| UBA4_RV_NotI          | ggggcgccgcccagtgatgatgatctgcagaattcctagtccacactgattctctcatc             | PC <sup>1</sup> |
| UBA4(329-440)_fw_Ndel | catatggcatttcagcgtatctacaagg                                            | PC <sup>2</sup> |
| MOCS3/UBA4_rv_SacI    | cccagactcaaagccttcgagcgtccc                                             | PC <sup>2</sup> |

## Abbreviations:

ko: knock-out

SM: site-directed mutagenesis

PC: plasmid construction of <sup>1</sup>pAJ82 or <sup>2</sup>pAJ113 (see Table S3).

Table S3. Plasmids used in this study.

| Plasmid   | Description                                                                                              | Reference  |
|-----------|----------------------------------------------------------------------------------------------------------|------------|
| pRS423    | 2 $\mu$ ori, <i>ScHIS3</i>                                                                               | [3]        |
| YCplac33  | <i>ARS1-CEN4</i> , <i>ScURA3</i>                                                                         | [4]        |
| YCplac111 | <i>ARS1-CEN4</i> , <i>ScLEU2</i>                                                                         | [4]        |
| YEplac195 | 2 $\mu$ ori, <i>ScURA3</i>                                                                               | [4]        |
| pHA-URM1  | <i>HA-URM1</i> cloned into pRS426 <sup>SmaI</sup>                                                        | [5]        |
| pCB45     | <i>PGAL1-TAP-URM1</i> cloned into YCplac33 <sup>HindIII/SalI</sup>                                       | [2]        |
| pAJ16     | <i>P<sub>ADH1</sub>-UBA4-T<sub>CYC1</sub></i> cloned into YCplac111 <sup>BamHI/SacI</sup>                | [2]        |
| pAJ52     | <i>P<sub>ADH1</sub>-UBA4-c-myc-T<sub>CYC1</sub></i> cloned into YCplac111 <sup>EcoRI/SacI</sup>          | [2]        |
| pAJ64     | <i>P<sub>ADH1</sub>-uba4-C225S-T<sub>CYC1</sub></i> cloned into YCplac111 <sup>BamHI/SacI</sup>          | this study |
| pAJ65     | <i>P<sub>ADH1</sub>-uba4-C397S-T<sub>CYC1</sub></i> cloned into YCplac111 <sup>BamHI/SacI</sup>          | this study |
| pAJ69     | <i>P<sub>ADH1</sub>-uba4-C225S/C397S-T<sub>CYC1</sub></i> cloned into YCplac111 <sup>BamHI/SacI</sup>    | this study |
| pAJ82     | <i>UBA4<sup>1-328</sup></i> cloned into pAJ16 <sup>NotI/NdeI</sup>                                       | this study |
| pAJ105    | <i>P<sub>ADH1</sub>-uba4-K122R-c-myc</i> cloned into YCplac111 <sup>EcoRI/SacI</sup>                     | this study |
| pAJ106    | <i>P<sub>ADH1</sub>-uba4-K132R-c-myc</i> cloned into YCplac111 <sup>EcoRI/SacI</sup>                     | this study |
| pAJ107    | <i>P<sub>ADH1</sub>-uba4-K248R-c-myc</i> cloned into YCplac111 <sup>EcoRI/SacI</sup>                     | this study |
| pAJ108    | <i>P<sub>ADH1</sub>-uba4-K156R-c-myc</i> cloned into YCplac111 <sup>EcoRI/SacI</sup>                     | this study |
| pQKE      | tQ <sup>UUG</sup> tK <sup>UUU</sup> tE <sup>UUC</sup> cloned into pRS425                                 | [2]        |
| pAJ113    | <i>P<sub>ADH1</sub>-UBA4<sup>329-440</sup>-T<sub>CYC1</sub></i> cloned into pRS423 <sup>BamHI/SacI</sup> | this study |

## 2. Supplementary Figures

Fig. S1:

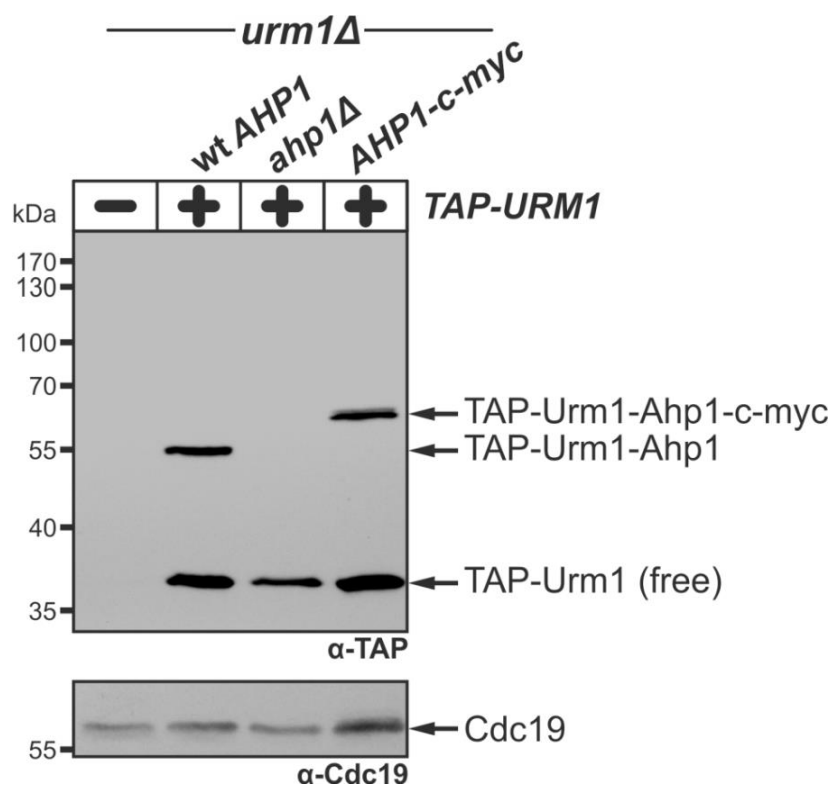

**FIGURE S1: Peroxiredoxin Ahp1 is targeted for urmylation in yeast.** Protein extracts from an *urm1Δ* reporter strain expressing *TAP-URM1* in the indicated genetic backgrounds, i.e. wild-type (wt) *AHP1*, *ahp1Δ* or *AHP1-c-myc*, were subjected to anti-TAP-based EMSA or immune blots with anti-Cdc19 antibodies (loading control). Arrows indicate the positions of non-conjugated (free) TAP-Urm1 as well as TAP-Urm1 conjugated to Ahp1 or Ahp1-c-myc, respectively.

Fig. S2:

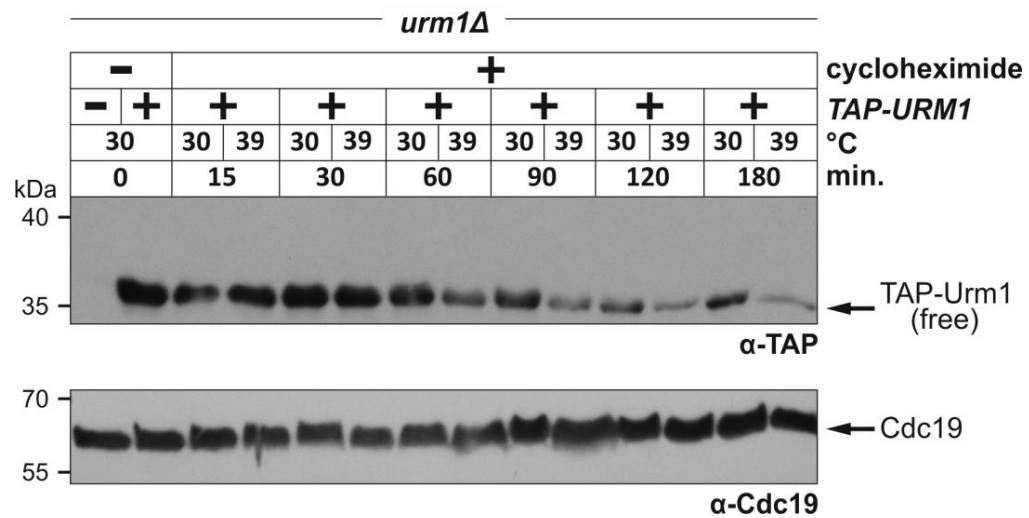

**FIGURE S2: The decrease in Urm1 abundance at 39°C is independent of cycloheximide inhibition of translation.** An *urm1Δ* strain expressing *TAP-URM1* was grown at 30° or 39°C for the indicated time in the absence (-) or presence (+) of 200  $\mu$ g/ml cycloheximide. Upon protein extraction, Western blots (see Fig. S1) were used to compare protein stability and abundance between non-conjugated (free) TAP-Urm1 and pyruvate kinase (Cdc19) used as loading control.

Fig. S3:

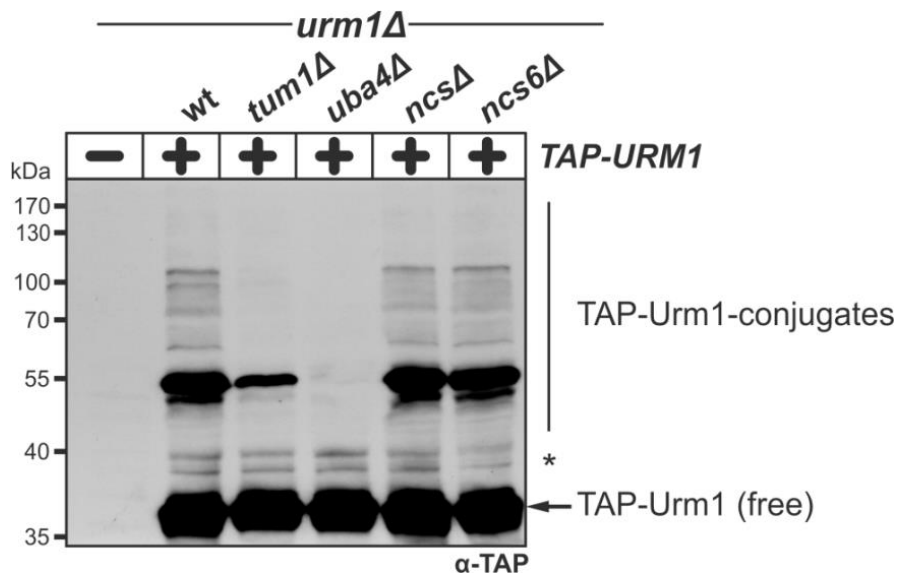

**FIGURE S3: Global urmylation efficiency is reduced in a *tum1Δ* mutant.** Protein extracts from an *urm1Δ* strain expressing *TAP-URM1* were obtained from wild-type (wt), *tum1Δ*, *uba4Δ*, *ncs2Δ* or *ncs6Δ* strain backgrounds and subjected to Urm1 conjugation studies (see Fig. S1). Unspecific TAP-Urm1 dependent signals are marked (\*).

Fig. S4:

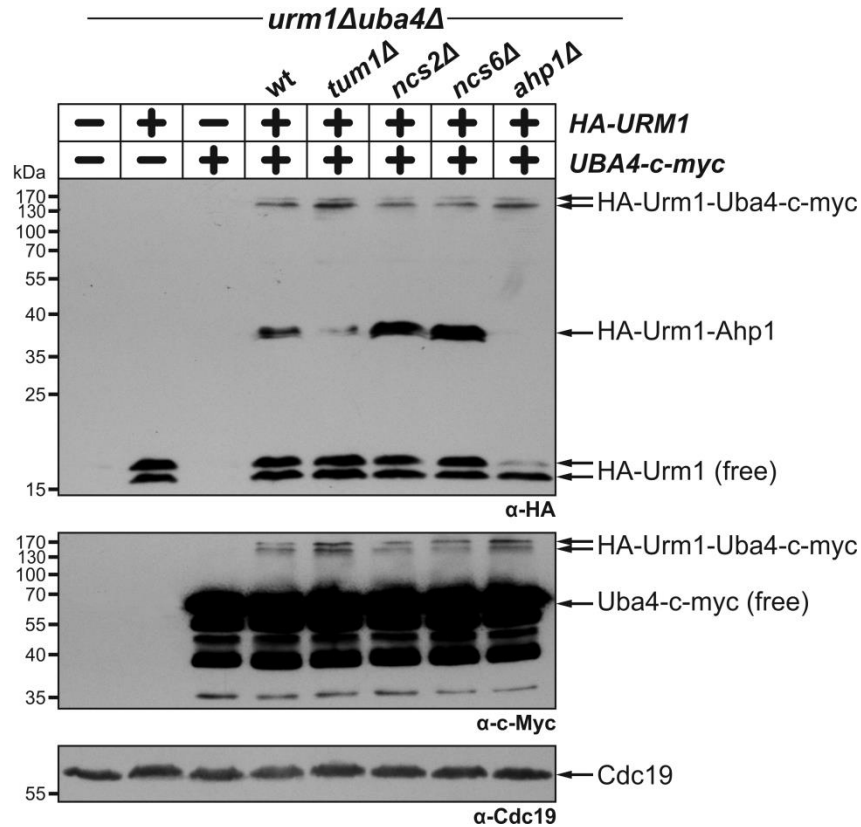

**FIGURE S4: Unlike Ahp1, urmylation of Uba4 seems not to be affected by lack of sulfur transferase Tum1.** Conjugation of HA-tagged Urm1 to c-myc-marked Uba4 was analyzed in wild-type (*wt*), *tum1Δ*, *ncs2Δ*, *ncs6Δ* or *ahp1Δ* backgrounds using EMSA (see Fig. S1) and Western blots specific for HA (Urm1), c-myc (Uba4) and Cdc19 (loading control). Arrows indicate non-conjugated (free) forms of c-myc-tagged Uba4 and HA-marked Urm1 as well as Ahp1 and c-myc-tagged Uba4 each conjugated to HA-Urm1.

Fig. S5:

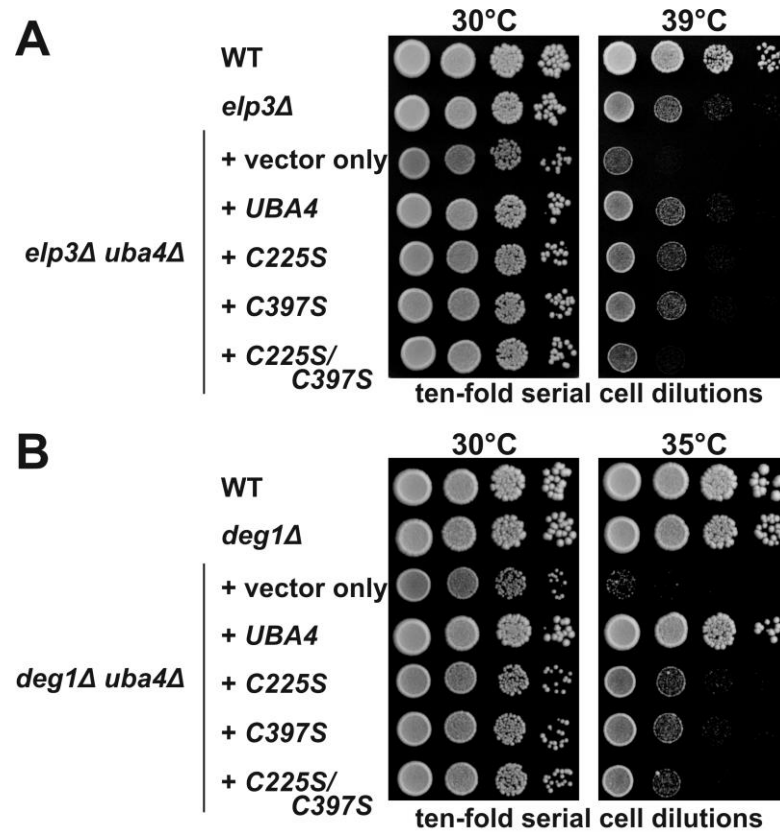

**FIGURE S5: Thermosensitivity of *elp3Δuba4Δ* or *deg1Δuba4Δ* strains is partially rescued by Cys to Ser substitution mutations (C225S, C397S and C225S/C397S) in Uba4.** Ten-fold serial dilutions of *elp3Δuba4Δ* (**A**) or *deg1Δuba4Δ* (**B**) reporter strains transformed with the indicated *UBA4* wild-type or mutant alleles were cultivated at 30°C (**A, B**), 35°C (**B**) or 39°C (**A**) for 3 days on YPD medium and compared to single *elp3Δ* (**A**) or *deg1Δ* (**B**) mutants alone and wild-type (WT) cells.

Fig. S6:

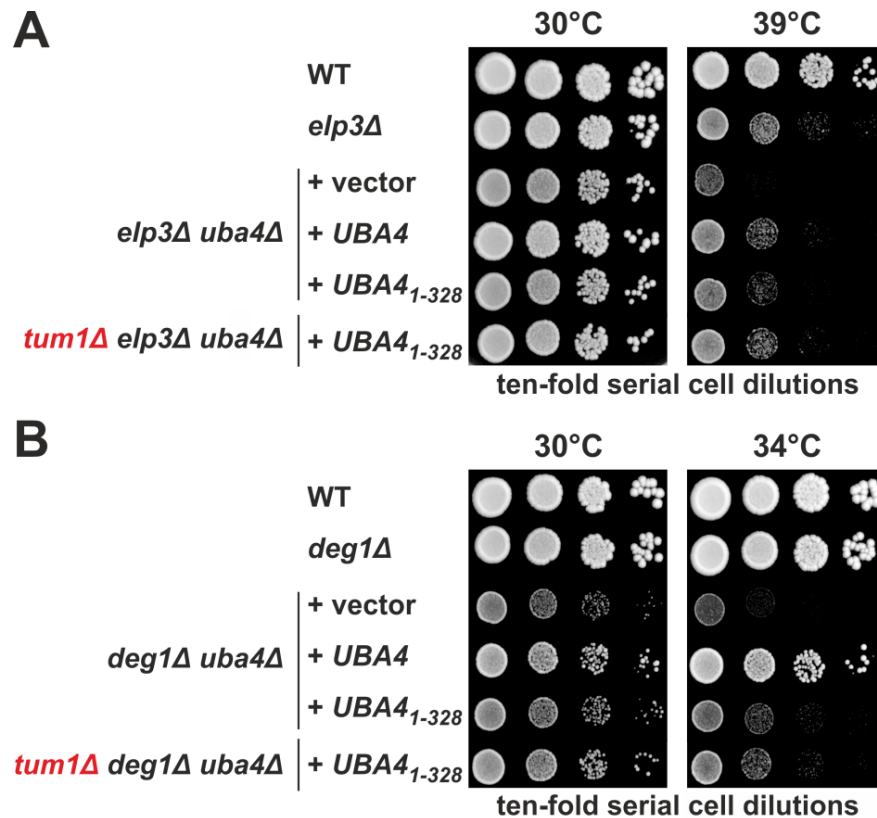

**FIGURE S6: Temperature sensitivity of *elp3Δuba4Δ* or *deg1Δuba4Δ* reporter strains is slightly suppressed by *Uba4*<sub>1-328</sub> and in a fashion independent of *TUM1* gene function.** Ten-fold serial dilutions of *elp3Δuba4Δ* (A) or *deg1Δuba4Δ* (B) reporter strains transformed with the indicated *UBA4* wild-type or mutant alleles or carrying an additional *TUM1* gene deletion (*tum1Δ*) were cultivated at 30°C (A, B), 34°C (B) or 39°C (A) for 3 days on YPD medium and compared to single *elp3Δ* (A) or *deg1Δ* (B) mutants alone and wild-type (WT) cells.



Fig. S7:

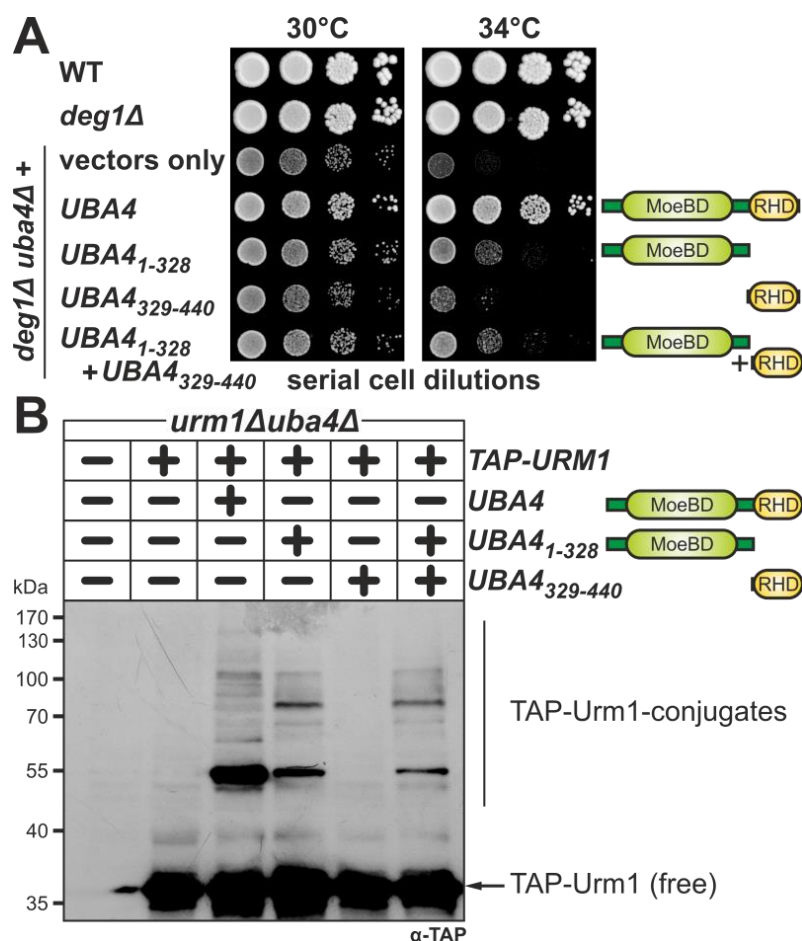

**FIGURE S7: Proper Uba4 functions in tRNA thiolation and urmylation are not sustained upon co-expression of its individual MoeBD (*Uba4*<sub>1-328</sub>) and RHD (*Uba4*<sub>329-440</sub>) domains. (A)** Expression of *Uba4*<sub>329-440</sub> alone or together with *Uba4*<sub>1-328</sub> fail to complement tRNA thiolation defects. The indicated *UBA4* alleles or vector controls were introduced into the *deg1Δuba4Δ* reporter strain. Following cultivation at 30°C or 34°C (see Fig. S6B) thermosensitivity was compared between the transformants, the single *deg1Δ* mutant alone and wild-type (WT) cells. **(B)** RHD (*Uba4*<sub>329-440</sub>) and MoeBD (*Uba4*<sub>1-328</sub>) co-expression cannot rescue protein urmylation defects, and RHD expression alone copies *uba4Δ* cells lacking urmylation. Urmylation studies used EMSA based on anti-TAP Western blots (see Fig. S1). Non-conjugated (free) TAP-Urm1 and different TAP-Urm1 conjugates are indicated.

Fig. S8:

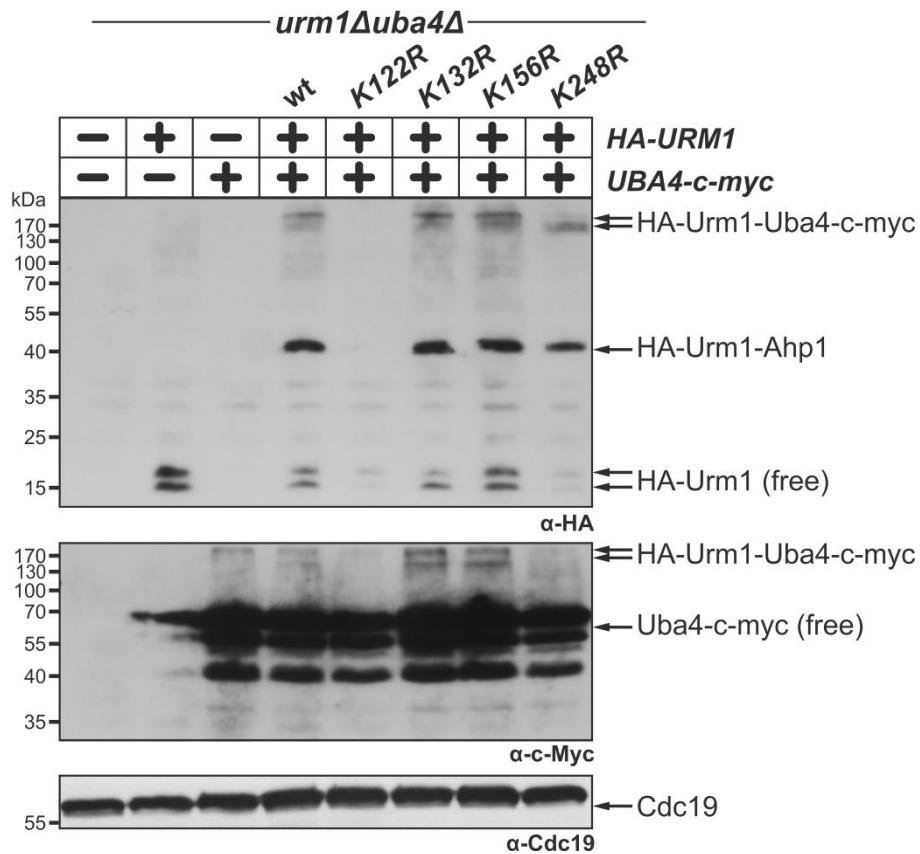

**FIGURE S8: Site-directed mutagenesis of the MoeBD region in Uba4 identifies candidate Lys residues critical for urmylation of Ahp1 and/or Uba4 itself.** Conjugation of HA-tagged Urm1 to Ahp1 and c-myc-marked Uba4 was analyzed in *uba4Δ* mutant cells carrying wild-type (wt) *UBA4* allele and the indicated Uba4 Lys (K) to Arg (R) substitution mutations. Urmylation was assessed by EMSAs (see Fig. S4) using Western blots specific for HA (Urm1), c-Myc (Uba4) and Cdc19 (loading control). Arrows indicate non-conjugated (free) forms of Uba4-c-myc and HA-Urm1 as well as HA-Urm1 conjugated to Ahp1 and c-myc-tagged Uba4, respectively.

Fig. S9:

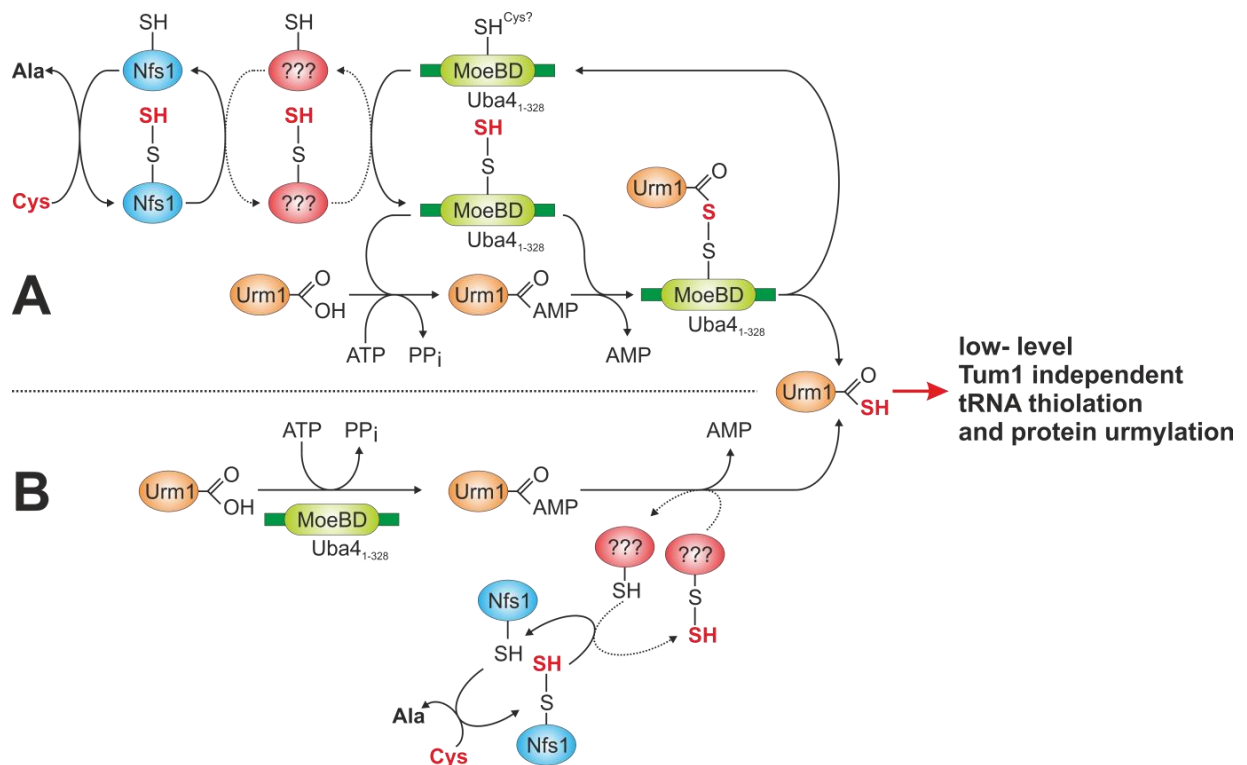

**FIGURE S9: Models to explain residual contribution of Uba4<sub>1-328</sub> to Urm1 activation and low-level tRNA thiolation and urmylation in the absence of both Tum1 and the RHD. (A)** Uba4<sub>1-328</sub> is still directly involved in the sulfur transfer to Urm1. The MoeBD region of the truncated activator Uba4<sub>1-328</sub> adenylates Urm1. Adenylated Urm1 forms an acyl-disulfide bond with a persulfide, which was previously formed at a cysteine residue within the MoeBD of Uba4<sub>1-328</sub>. Persulfide formation could involve Nfs1 and/or an unknown (?) Tum1-independent S-transferase. **(B)** Sulfur incorporation into Urm1 is not directly mediated by Uba4<sub>1-328</sub>. In this case Uba4<sub>1-328</sub> is only involved in E1-like adenylation of Urm1. The thiocarboxylation of Urm1 could be directly mediated by Nfs1 or an S-transferase alternative to Tum1 (?). Both routes (A,B) may generate Urm1-COSH levels sufficient for the observed low residual tRNA thiolation and urmylation capacities (see Fig. 5 and Fig. S7) of cells producing the MoeBD region (without the RHD) on Uba4<sub>1-328</sub>.

#### 4. Supplementary References

1. Klassen R, Grunewald P, Thüring KL, Eichler C, Helm M, and Schaffrath R (2015). Loss of anticodon wobble uridine modifications affects tRNA<sup>Lys</sup> function and protein levels in *Saccharomyces cerevisiae*. **PLoS ONE** 10(3): e0119261.
2. Jüdes A, Ebert F, Bär C, Thüring KL, Harrer A, Klassen R, Helm M, Stark MJ, and Schaffrath R (2015). Urm1 and tRNA thiolation functions of ubiquitin-like Uba4-Urm1 systems are conserved from yeast to man. **FEBS Lett** 589(8): 904-909.
3. Christianson TW, Sikorski RS, Dante M, Shero JH, and Hieter P (1992). Multifunctional yeast high-copy-number shuttle vectors. **Gene** 110(1): 119-122.
4. Gietz RD and Sugino A (1988). New yeast-*Escherichia coli* shuttle vectors constructed with *in vitro* mutagenized yeast genes lacking six-base pair restriction sites. **Gene** 74(2): 527-534.
5. Furukawa K, Mizushima N, Noda T, and Ohsumi Y (2000). A protein conjugation system in yeast with homology to biosynthetic enzyme reaction of prokaryotes. **J Biol Chem** 275(11): 7462-7465.
